# Supplementary material for: Endogenous murine leukemia retroviral variation across wild European and inbred strains of house mouse
Source: PubMed Central journal article supplement (PMC4538763; doi:10.1186/s12864-015-1766-z), 2015-08-18
Supplement: 12864_2015_1766_MOESM1_ESM.pdf [file 12864_2015_1766_MOESM1_ESM.pdf]

| PCR product 1 |       |       |       |       |       |       |       |       |       |       |       |       |       |       |       |       |       |       |       |       |       |       |       |       |       |       |       |       |       |       |       |       |       |       |       |       |       |       |       |        |        |        |        |      |      |      |
|---------------|-------|-------|-------|-------|-------|-------|-------|-------|-------|-------|-------|-------|-------|-------|-------|-------|-------|-------|-------|-------|-------|-------|-------|-------|-------|-------|-------|-------|-------|-------|-------|-------|-------|-------|-------|-------|-------|-------|-------|--------|--------|--------|--------|------|------|------|
|               | Xm8   | Xm9   | Xm10  | Xm12  | Xm13  | Xm15  | Xm17  | Xm18  | Xm19  | Xm41  | Xm42  | Xm43  | Pmv1  | Pmv5  | Pmv7  | Pmv8  | Pmv9  | Pmv10 | Pmv11 | Pmv12 | Pmv13 | Pmv14 | Pmv15 | Pmv16 | Pmv18 | Pmv19 | Pmv20 | Pmv21 | Pmv22 | Pmv23 | Pmv24 | Mpmv1 | Mpmv2 | Mpmv4 | Mpmv5 | Mpmv6 | Mpmv7 | Mpmv8 | Mpmv9 | Mpmv10 | Mpmv11 | Mpmv12 | Mpmv13 |      |      |      |
| Xm8           | 100.0 | 92.2  | 80.8  | 85.7  | 90.3  | 91.3  | 89.4  | 96.1  | 86.1  | 83.8  | 81.5  | 83.8  | 81.5  | 81.5  | 80.8  | 79.0  | 81.5  | 81.1  | 81.5  | 81.9  | 79.0  | 79.5  | 79.5  | 81.5  | 81.5  | 81.5  | 81.9  | 81.5  | 81.5  | 79.5  | 81.9  | 81.8  | 81.2  | 82.0  | 81.6  | 81.4  | 81.4  | 82.5  | 81.2  | 81.9   | 82.2   | 81.4   | 82.0   |      |      |      |
| Xm9           | 92.2  | 100.0 | 74.7  | 89.2  | 84.0  | 83.6  | 82.7  | 89.6  | 88.8  | 77.9  | 79.4  | 77.9  | 79.4  | 79.4  | 78.3  | 76.9  | 79.4  | 79.0  | 79.4  | 79.4  | 79.0  | 78.3  | 78.3  | 79.4  | 79.4  | 79.4  | 79.4  | 79.4  | 79.0  | 79.4  | 79.4  | 80.1  | 79.7  | 79.5  | 79.4  | 79.7  | 79.2  | 79.9  | 80.3  | 79.4   | 80.1   |        |        |      |      |      |
| Xm10          | 80.8  | 74.7  | 100.0 | 82.0  | 88.2  | 75.6  | 89.7  | 82.0  | 81.6  | 81.8  | 78.0  | 81.8  | 78.0  | 78.0  | 77.5  | 75.5  | 78.0  | 77.6  | 78.0  | 78.4  | 75.4  | 75.9  | 75.9  | 78.0  | 78.0  | 78.0  | 78.4  | 78.0  | 78.0  | 78.4  | 79.2  | 78.7  | 79.4  | 79.2  | 78.8  | 78.7  | 79.9  | 78.7  | 79.4  | 79.6   | 78.8   | 79.4   |        |      |      |      |
| Xm12          | 85.7  | 89.2  | 82.0  | 100.0 | 88.7  | 91.5  | 91.0  | 92.6  | 96.7  | 83.8  | 79.8  | 83.8  | 79.8  | 79.8  | 79.1  | 77.3  | 79.8  | 79.4  | 79.8  | 80.2  | 77.3  | 77.8  | 77.8  | 79.8  | 79.8  | 79.8  | 80.2  | 79.7  | 79.8  | 80.2  | 82.2  | 81.8  | 82.4  | 82.2  | 81.8  | 81.8  | 82.9  | 81.8  | 82.4  | 82.2   | 82.0   | 82.0   | 82.4   |      |      |      |
| Xm13          | 90.3  | 84.0  | 88.2  | 88.7  | 100.0 | 83.3  | 96.5  | 88.9  | 88.7  | 91.3  | 86.0  | 91.3  | 86.0  | 86.0  | 85.2  | 83.3  | 86.0  | 85.5  | 86.0  | 86.4  | 83.3  | 83.7  | 83.7  | 86.0  | 86.0  | 86.0  | 86.4  | 85.9  | 86.0  | 83.7  | 86.4  | 88.9  | 88.2  | 88.1  | 89.1  | 88.5  | 88.4  | 89.7  | 88.2  | 88.9   | 89.4   | 88.4   | 89.1   |      |      |      |
| Xm15          | 83.6  | 83.6  | 75.6  | 91.5  | 83.3  | 100.0 | 84.2  | 85.5  | 91.5  | 81.5  | 78.2  | 73.9  | 78.2  | 73.9  | 73.9  | 73.9  | 73.9  | 73.9  | 73.9  | 73.9  | 73.9  | 73.9  | 73.9  | 73.9  | 73.9  | 73.9  | 73.9  | 73.9  | 73.9  | 73.9  | 73.9  | 73.9  | 73.9  | 73.9  | 73.9  | 73.9  | 73.9  | 73.9  | 73.9  | 73.9   | 73.9   | 73.9   | 73.9   |      |      |      |
| Xm17          | 89.4  | 82.7  | 89.7  | 91.0  | 96.5  | 84.2  | 100.0 | 91.2  | 91.0  | 89.6  | 86.3  | 89.6  | 86.3  | 86.3  | 85.7  | 83.5  | 86.3  | 85.8  | 86.3  | 86.7  | 83.5  | 84.0  | 84.0  | 86.3  | 86.3  | 86.3  | 86.7  | 86.2  | 86.3  | 84.0  | 86.7  | 87.1  | 86.4  | 87.3  | 87.1  | 86.7  | 86.6  | 87.9  | 86.4  | 87.1   | 87.6   | 86.6   | 87.3   |      |      |      |
| Xm18          | 96.1  | 89.6  | 82.0  | 99.6  | 88.9  | 91.5  | 91.2  | 100.0 | 96.7  | 84.2  | 79.8  | 84.2  | 79.8  | 79.8  | 79.1  | 77.3  | 79.8  | 79.4  | 79.8  | 80.2  | 77.3  | 77.8  | 77.8  | 79.8  | 79.8  | 79.8  | 80.2  | 79.7  | 79.8  | 77.8  | 80.2  | 80.5  | 79.9  | 80.7  | 81.2  | 80.1  | 80.1  | 81.2  | 79.9  | 80.5   | 80.9   | 80.1   | 80.7   |      |      |      |
| Xm19          | 96.1  | 88.8  | 81.6  | 98.7  | 88.7  | 91.5  | 91.0  | 98.7  | 100.0 | 84.1  | 79.6  | 84.1  | 79.6  | 79.6  | 79.6  | 78.9  | 77.1  | 79.6  | 79.2  | 79.6  | 80.0  | 77.1  | 77.6  | 77.6  | 79.6  | 79.6  | 79.6  | 80.0  | 79.5  | 79.6  | 77.5  | 80.0  | 80.3  | 80.8  | 80.5  | 81.0  | 79.9  | 79.9  | 81.0  | 80.8   | 81.5   | 80.7   | 81.0   | 80.5 |      |      |
| Xm41          | 83.8  | 77.9  | 81.8  | 84.6  | 91.3  | 78.2  | 89.6  | 84.2  | 84.1  | 100.0 | 78.5  | 98.0  | 78.3  | 78.3  | 78.5  | 80.3  | 77.9  | 78.3  | 78.7  | 79.1  | 78.1  | 78.1  | 78.3  | 78.3  | 78.3  | 78.7  | 78.3  | 79.1  | 78.7  | 85.6  | 84.5  | 85.4  | 85.8  | 84.7  | 85.2  | 84.5  | 85.2  | 85.6  | 84.7  | 85.4   | 85.4   | 85.4   | 85.4   | 85.4 |      |      |
| Xm42          | 79.5  | 79.4  | 75.9  | 77.8  | 83.7  | 72.2  | 84.0  | 77.8  | 77.8  | 78.5  | 100.0 | 78.5  | 86.6  | 86.6  | 87.9  | 95.6  | 98.6  | 98.1  | 98.6  | 98.4  | 97.9  | 98.1  | 98.1  | 98.6  | 98.6  | 98.6  | 98.4  | 97.9  | 98.6  | 97.7  | 98.4  | 76.5  | 75.9  | 76.7  | 77.0  | 76.2  | 76.1  | 75.9  | 76.6  | 77.0   | 76.1   | 76.7   | 76.7   |      |      |      |
| Xm43          | 83.8  | 77.9  | 81.8  | 84.6  | 91.3  | 78.2  | 89.6  | 84.2  | 84.1  | 98.0  | 78.5  | 100.0 | 78.3  | 78.3  | 78.5  | 80.8  | 78.3  | 77.9  | 78.3  | 78.7  | 79.1  | 78.1  | 78.1  | 78.3  | 78.3  | 78.3  | 78.7  | 78.3  | 78.3  | 79.3  | 78.7  | 85.6  | 84.9  | 85.8  | 85.4  | 85.2  | 85.2  | 86.1  | 84.9  | 85.6   | 86.1   | 85.2   | 85.8   |      |      |      |
| Pmv1          | 79.5  | 79.4  | 75.9  | 77.8  | 83.7  | 72.2  | 84.0  | 77.8  | 77.8  | 78.3  | 98.6  | 78.3  | 100.0 | 100.0 | 99.3  | 96.7  | 100.0 | 99.5  | 100.0 | 99.8  | 99.3  | 99.5  | 99.5  | 100.0 | 100.0 | 100.0 | 99.8  | 99.3  | 100.0 | 99.1  | 99.8  | 76.5  | 75.9  | 76.7  | 77.0  | 76.2  | 76.1  | 76.1  | 75.9  | 76.6   | 77.0   | 76.1   | 76.7   | 76.7 |      |      |
| Pmv5          | 79.5  | 79.4  | 75.9  | 77.8  | 83.7  | 72.2  | 84.0  | 77.8  | 77.8  | 78.3  | 98.6  | 78.3  | 100.0 | 100.0 | 99.3  | 96.7  | 100.0 | 99.5  | 100.0 | 99.8  | 99.3  | 99.5  | 99.5  | 100.0 | 100.0 | 100.0 | 99.8  | 99.3  | 100.0 | 99.1  | 99.8  | 76.5  | 75.9  | 76.7  | 77.0  | 76.2  | 76.1  | 76.1  | 75.9  | 76.6   | 77.0   | 76.1   | 76.7   | 76.7 |      |      |
| Pmv7          | 80.8  | 78.3  | 77.5  | 79.1  | 85.2  | 73.3  | 85.7  | 79.1  | 78.9  | 78.5  | 97.9  | 78.5  | 99.3  | 99.3  | 100.0 | 96.3  | 98.8  | 99.3  | 99.5  | 98.6  | 99.3  | 99.3  | 99.3  | 99.3  | 99.3  | 99.3  | 99.3  | 99.3  | 99.3  | 99.3  | 99.3  | 99.3  | 99.3  | 99.3  | 99.3  | 99.3  | 99.3  | 99.3  | 99.3  | 99.3   | 99.3   | 99.3   | 99.3   | 99.3 |      |      |
| Pmv8          | 77.0  | 76.9  | 73.4  | 75.5  | 81.1  | 69.9  | 81.3  | 75.3  | 75.1  | 78.3  | 95.6  | 80.8  | 96.7  | 96.7  | 96.0  | 100.0 | 96.3  | 98.8  | 96.7  | 96.5  | 96.0  | 96.3  | 96.3  | 96.7  | 96.7  | 96.5  | 96.0  | 96.7  | 96.5  | 96.0  | 96.7  | 96.0  | 96.5  | 73.8  | 73.2  | 74.0  | 74.2  | 73.4  | 73.4  | 73.4   | 73.2   | 73.8   | 74.2   | 74.0 | 74.0 |      |
| Pmv9          | 79.5  | 79.4  | 75.9  | 77.8  | 83.7  | 72.2  | 84.0  | 77.8  | 77.8  | 78.3  | 98.6  | 78.3  | 100.0 | 100.0 | 99.3  | 96.7  | 100.0 | 99.5  | 100.0 | 99.8  | 99.3  | 99.5  | 99.5  | 100.0 | 100.0 | 100.0 | 99.8  | 99.3  | 100.0 | 99.1  | 99.8  | 76.5  | 75.9  | 76.7  | 77.0  | 76.2  | 76.1  | 76.1  | 75.9  | 76.6   | 77.0   | 76.1   | 76.7   | 76.7 |      |      |
| Pmv10         | 79.1  | 79.0  | 75.5  | 77.4  | 83.3  | 71.8  | 83.6  | 77.4  | 77.2  | 77.9  | 98.1  | 77.9  | 99.5  | 99.5  | 98.8  | 96.3  | 99.5  | 100.0 | 99.5  | 99.3  | 99.3  | 99.5  | 99.1  | 99.5  | 99.5  | 99.5  | 99.3  | 99.3  | 99.5  | 99.3  | 99.3  | 99.3  | 99.3  | 99.3  | 99.3  | 99.3  | 99.3  | 99.3  | 99.3  | 99.3   | 99.3   | 99.3   | 99.3   | 99.3 | 99.3 |      |
| Pmv11         | 79.5  | 79.4  | 75.9  | 77.8  | 83.7  | 72.2  | 84.0  | 77.8  | 77.8  | 78.3  | 98.6  | 78.3  | 100.0 | 100.0 | 99.3  | 96.7  | 100.0 | 99.5  | 100.0 | 99.8  | 99.3  | 99.5  | 99.5  | 100.0 | 100.0 | 100.0 | 99.8  | 99.3  | 100.0 | 99.1  | 99.8  | 76.5  | 75.9  | 76.7  | 77.0  | 76.2  | 76.1  | 76.1  | 75.9  | 76.6   | 77.0   | 76.1   | 76.7   | 76.7 |      |      |
| Pmv12         | 81.9  | 79.4  | 79.4  | 80.2  | 86.4  | 74.3  | 86.7  | 80.2  | 80.0  | 78.7  | 98.4  | 78.7  | 99.8  | 99.8  | 99.5  | 96.5  | 99.8  | 99.3  | 99.8  | 100.0 | 99.1  | 99.3  | 99.3  | 99.8  | 99.8  | 99.8  | 100.0 | 99.5  | 99.8  | 98.8  | 100.0 | 76.5  | 75.9  | 76.7  | 77.0  | 76.2  | 76.1  | 76.1  | 75.9  | 76.6   | 77.0   | 76.1   | 76.7   | 76.7 |      |      |
| Pmv13         | 79.0  | 79.0  | 75.4  | 77.3  | 83.3  | 71.7  | 83.5  | 77.3  | 77.1  | 80.2  | 97.9  | 80.2  | 99.3  | 99.3  | 98.6  | 96.0  | 99.8  | 99.3  | 99.3  | 99.1  | 100.0 | 98.8  | 98.8  | 98.8  | 99.3  | 99.3  | 99.3  | 99.1  | 98.6  | 99.3  | 98.8  | 99.1  | 76.1  | 75.5  | 76.3  | 76.5  | 75.7  | 75.7  | 75.7  | 75.5   | 76.2   | 76.5   | 75.7   | 76.3 |      |      |
| Pmv14         | 79.5  | 78.3  | 75.9  | 77.8  | 83.7  | 72.2  | 84.0  | 77.8  | 77.8  | 78.1  | 98.1  | 78.1  | 99.5  | 99.5  | 99.3  | 96.3  | 99.5  | 99.5  | 99.3  | 98.8  | 100.0 | 99.5  | 99.5  | 99.5  | 99.5  | 99.3  | 99.3  | 99.5  | 99.3  | 99.3  | 99.3  | 99.3  | 99.3  | 99.3  | 99.3  | 99.3  | 99.3  | 99.3  | 99.3  | 99.3   | 99.3   | 99.3   | 99.3   | 99.3 | 99.3 |      |
| Pmv15         | 79.5  | 78.3  | 75.9  | 77.8  | 83.7  | 72.2  | 84.0  | 77.8  | 77.8  | 78.1  | 98.1  | 78.1  | 99.5  | 99.5  | 99.3  | 96.3  | 99.5  | 99.5  | 99.3  | 98.8  | 100.0 | 99.5  | 99.5  | 99.5  | 99.5  | 99.3  | 99.3  | 99.5  | 99.3  | 99.3  | 99.3  | 99.3  | 99.3  | 99.3  | 99.3  | 99.3  | 99.3  | 99.3  | 99.3  | 99.3   | 99.3   | 99.3   | 99.3   | 99.3 | 99.3 | 99.3 |
| Pmv16         | 79.5  | 79.4  | 75.9  | 77.8  | 83.7  | 72.2  | 84.0  | 77.8  | 77.8  | 78.3  | 98.6  | 78.3  | 100.0 | 100.0 | 99.3  | 96.7  | 100.0 | 99.5  | 100.0 | 99.8  | 99.3  | 99.5  | 99.5  | 100.0 | 100.0 | 100.0 | 99.8  | 99.3  | 100.0 | 99.1  | 99.8  | 76.5  | 75.9  | 76.7  | 77.0  | 76.2  | 76.1  | 76.1  | 75.9  | 76.6   | 77.0   | 76.1   | 76.7   | 76.7 |      |      |
| Pmv18         | 79.5  | 79.4  | 75.9  | 77.8  | 83.7  | 72.2  | 84.0  | 77.8  | 77.8  | 78.3  | 98.6  | 78.3  | 100.0 | 100.0 | 99.3  | 96.7  | 100.0 | 99.5  | 100.0 | 99.8  | 99.3  | 99.5  | 99.5  | 100.0 | 100.0 | 100.0 | 99.8  | 99.3  | 100.0 | 99.1  | 99.8  | 76.5  | 75.9  | 76.7  | 77.0  | 76.2  | 76.1  | 76.1  | 75.9  | 76.6   | 77.0   | 76.1   | 76.7   | 76.7 |      |      |
| Pmv19         | 79.5  | 79.4  | 75.9  | 77.8  | 83.7  | 72.2  | 84.0  | 77.8  | 77.8  | 78.3  | 98.6  | 78.3  | 100.0 | 100.0 | 99.3  | 96.7  | 100.0 | 99.5  | 100.0 | 99.8  | 99.3  | 99.5  | 99.5  | 100.0 | 100.0 | 100.0 | 99.8  | 99.3  | 100.0 | 99.1  | 99.8  | 76.5  | 75.9  | 76.7  | 77.0  | 76.2  | 76.1  | 76.1  | 75.9  | 76.6   | 77.0   | 76.1   | 76.7   | 76.7 |      |      |
| Pmv20         | 81.9  | 79.4  | 79.4  | 80.2  | 86.4  | 74.3  | 86.7  | 80.2  | 80.0  | 78.7  | 98.4  | 78.7  | 99.8  | 99.8  | 99.5  | 96.5  | 99.8  | 99.3  | 99.8  | 100.0 | 99.1  | 99.3  | 99.3  | 99.8  | 99.8  | 99.8  | 100.0 | 99.5  | 99.8  | 98.8  | 100.0 | 76.5  | 75.9  | 76.7  | 77.0  | 76.2  | 76.1  | 76.1  | 75.9  | 76.6   | 77.0   | 76.1   | 76.7   | 76.7 |      |      |
| Pmv21         | 81.9  | 79.4  | 79.4  | 80.2  | 86.4  | 74.3  | 86.7  | 80.2  | 80.0  | 78.7  | 98.4  | 78.7  | 99.8  | 99.8  | 99.5  | 96.5  | 99.8  | 99.3  | 99.8  | 100.0 | 99.1  | 99.3  | 99.3  | 99.8  | 99.8  | 99.8  | 100.0 | 99.5  | 99.8  | 98.8  | 100.0 | 76.5  | 75.9  | 76.7  | 77.0  | 76.2  | 76.1  | 76.1  | 75.9  | 76.6   | 77.0   | 76.1   | 76.7   | 76.7 |      |      |
| Pmv22         | 81.9  | 79.4  | 79.4  | 80.2  | 86.4  | 74.3  | 86.7  | 80.2  | 80.0  | 78.7  | 98.4  | 78.7  | 99.8  | 99.8  | 99.5  | 96.5  | 99.8  | 99.3  | 99.8  | 100.0 | 99.1  | 99.3  | 99.3  | 99.8  | 99.8  | 99.8  | 100.0 | 99.5  | 99.8  | 98.8  | 100.0 | 76.5  | 75.9  | 76.7  | 77.0  | 76.2  | 76.1  | 76.1  | 75.9  | 76.6   | 77.0   | 76.1   | 76.7   | 76.7 |      |      |
| Pmv23         | 79.5  | 79.4  | 75.9  | 77.8  | 83.7  | 72.2  | 84.0  | 77.8  | 77.8  | 78.3  | 98.6  | 78.3  | 100.0 | 100.0 | 99.   |       |       |       |       |       |       |       |       |       |       |       |       |       |       |       |       |       |       |       |       |       |       |       |       |        |        |        |        |      |      |      |
